# Supplementary material
Source: publisher site journal article supplement (https://www.degruyterbrill.com/publication/isbn/9783110343830/downloadAsset/9783110343830_Begleitprogramme.zip)
Supplement: Supplementary file 1 [file readme.doc]

Der Gebrauch der Begleitprogramme

Josef Hoffmann, Franz Quint

Die Begleitprogramme sind für jedes Kapitel in einem separaten Verzeichnis abgelegt. So z.B. sind die Programme (in MATLAB auch Scripts genannt) des 2. Kapitels im Verzeichnis Kap.2 enthalten. Im Buch werden bei den Bildern, die Ergebnisse darstellen, in den Unterschriften auch die Programme (mit Endung *.m) bzw. die Modelle (mit Endung *.mdl), die dazu eingesetzt wurden, angegeben.

Die Programme und Modelle die zusammenarbeiten, haben Namen, die sich nur geringfügig unterscheiden, gewöhnlich durch ein Underscore (**_**). So z.B. wird das Modell **buck_down_3.slx (bzw. buck_down_3.mdl)** mit dem Programm **buck_down3.m** initialisiert und aufgerufen. Für die Simulink-Modelle und die

entsprechenden Programme sollte man nicht dieselben Namen benutzen, auch wenn sie unterschiedliche Endungen haben.

Die Simulink-Modelle haben den großen Vorteil, dass sie ein klar strukturiertes Abbild der Anwendung darstellen, sind leicht zu verstehen und sind nicht so Fehleranfällig wie die Programme. Daher werden in den Programmen die Modelle nur initialisiert, dann aufgerufen und anschließend die Ergebnisse dargestellt.

Um mit den Modellen und Programmen eines Kapitels zu arbeiten, werden diese in einem Verzeichnis kopiert und den MATLAB-Pfad im Menü des Kommandofensters auf dieses Verzeichnis gesetzt. Man überprüft sehr einfach, dass der Pfad korrekt ist mit Hilfe des alten DOS-Befehls **dir**. Es müssen alle Programme aufgelistet erscheinen.

Es gibt auch andere Möglichkeiten, den Pfad zu setzen, z.B. mit den Funktionen **addpath, rmpath**.

Die Programme und Modelle wurden zuletzt mit der Version 2013 b getestet.

In den meisten Programmen und Modellen werden die üblichen Funktionen

und Befehle der MATLAB-Hochsprache benutzt, die unabhängig vom Betriebssystem des Rechners sind.
